# Supplementary material
Source: PubMed Central journal article supplement (PMC2633545)
Supplement: 0807423106_0807423106SI.pdf [file 0807423106_0807423106SI.pdf]

# Supporting Information

Wang *et al.* 10.1073/pnas.0807423106

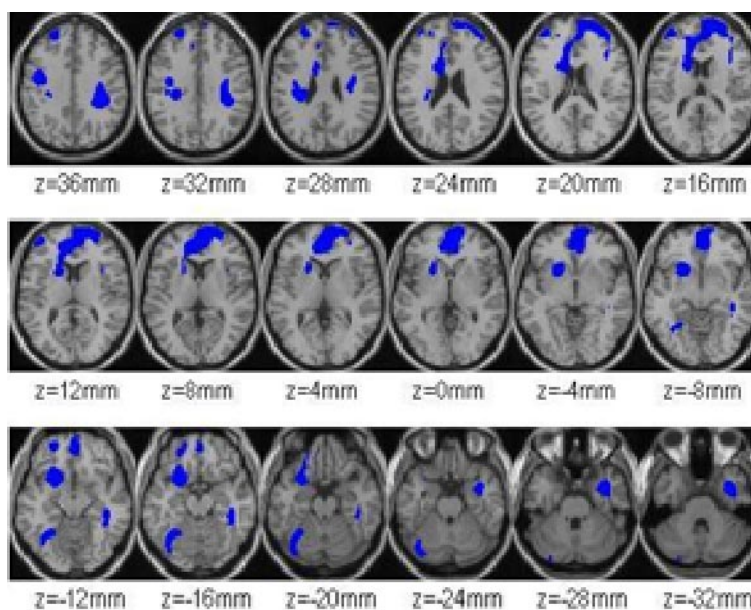

**Fig. 1.** SPM results ( $P < 0.05$ ) for the difference between women and men during food stimulation without cognitive inhibition. Color-coded SPM results are displayed in a transaxial plane superimposed on a structural brain MR image. The results (T value) are presented using the color scale where blue represents deactivation as a result of lesser metabolic activation in men than women.

**Table S1. Characteristics of study subjects**

|                                    | Women           | Men            | p value |
|------------------------------------|-----------------|----------------|---------|
| Number of subjects                 | 13              | 10             |         |
| Age range (years old)              | 21–48           | 24–45          |         |
| Age mean (years old)               | 33.6 ± 8.6      | 31.2 ± 5.8     | NS      |
| Body weight range (lb)             | 115–185         | 137–200        |         |
| Body weight mean (lb)              | 148 ± 25        | 166 ± 20       | NS      |
| BMI range (kg/meter <sup>2</sup> ) | 21.6–28.9       | 21–29.6        |         |
| BMI mean (kg/meter <sup>2</sup> )  | 25.1 ± 2.9      | 24.5 ± 2.6     | NS      |
| Education (years)                  | 15.2 ± 2.4      | 14.2 ± 2.2     | NS      |
| Handedness                         | 10 right/3 left | 8 right/2 left |         |

**Table S2. Comparison between women and men for the difference and percent changes in the scores (from 1 to 10; 0 is the least and 10 is the most) of self-report of hunger and alertness during food stimulation conditions (BL: Baseline, FS: food stimulation without cognitive inhibition, CI: food stimulation with cognitive inhibition)**

|                           | Hunger    |           |         | Alertness |           |         |
|---------------------------|-----------|-----------|---------|-----------|-----------|---------|
|                           | Women     | Men       | p value | Women     | Men       | p value |
| Baseline (BL)             | 5.6 ± 2.4 | 5.5 ± 2.2 | NS      | 9.2 ± 1.2 | 7.8 ± 1.8 | 0.05    |
| Food stimulation (FS)     | 7.7 ± 1.4 | 8.5 ± 1.0 | NS      | 9.1 ± 1.6 | 9.8 ± 0.7 | NS      |
| Cognitive inhibition (CI) | 5.4 ± 2.7 | 4.6 ± 3.0 | 0.01    | 9.1 ± 1.7 | 8.0 ± 2.1 | NS      |
| BL vs FS (% change)       | +43 ± 48% | +70 ± 76% | NS      | -0.2 ± 9% | +33 ± 42% | 0.006   |
| BL vs FS (p value)        | 0.03      | 0.002     |         | NS        | 0.008     |         |
| FS vs CI (% change)       | -39 ± 62% | -88 ± 79% | 0.03    | +2 ± 16%  | -23 ± 36% | 0.05    |
| FS vs CI (p value)        | 0.001     | 0.0006    |         | NS        | 0.04      |         |

**Table S3. Average measures for whole brain metabolism (unit:  $\mu\text{mol}/100\text{ g}/\text{min}$ ) for the baseline, food stimulation without cognitive inhibition (FS), and food stimulation with cognitive inhibition (CI) conditions in women and men**

|                           | Women            | Men               | p value |
|---------------------------|------------------|-------------------|---------|
| Baseline (BL)             | 36.7 $\pm$ 5.1   | 34.7 $\pm$ 3.7    | NS      |
| Food Stimulation (FS)     | 45.9 $\pm$ 10.3  | 39.9 $\pm$ 6.5    | NS      |
| Cognitive Inhibition (CI) | 43.1 $\pm$ 6.0   | 36.3 $\pm$ 3.4    | 0.002   |
| BL vs FS (% changes)      | +25 $\pm$ 8%     | +15.9 $\pm$ 21.9% | NS      |
| BL vs FS (p value)        | 0.006            | 0.05              |         |
| FP vs CI (% changes)      | -3.1 $\pm$ 18.6% | -7.5 $\pm$ 11.9%  | NS      |
| FP vs CI (p value)        | 0.3              | 0.07              |         |

**Table S4. Independent samples t-tests (df = 21) on regions of interest between women and men at the cognitive inhibition condition. It shows that male had significantly lower metabolism than women**

| Regions of interest      | t-value | p-value |
|--------------------------|---------|---------|
| Right Anterior Cingulate | 3.82    | 0.001   |
| Right Anterior Insula    | 2.15    | 0.043   |
| Right Thalamus           | 2.39    | 0.026   |
| Right Caudate            | 2.8     | 0.011   |
| Right Putamen            | 2.71    | 0.013   |
| Right Ventral Striatum   | 2.46    | 0.023   |
| Right Amygdala           | 2.09    | 0.049   |
| Right Hippocampus        | 2.76    | 0.012   |
| Right Lateral OFC        | 3.4     | 0.003   |
| Right Medial OFC         | 2.97    | 0.007   |
| Right Rectal Gyrus       | 2.28    | 0.033   |
| Left Anterior Cingulate  | 2.88    | 0.009   |
| Left Anterior Insula     | 2.67    | 0.014   |
| Left Thalamus            | 2.85    | 0.010   |
| Left Caudate             | 3.17    | 0.005   |
| Left Putamen             | 3.68    | 0.001   |
| Left Ventral Striatum    | 3.25    | 0.004   |
| Left Amygdala            | 3.83    | 0.001   |
| Left Hippocampus         | 2.4     | 0.026   |
| Left Lateral OFC         | 2.67    | 0.014   |
| Left Medial OFC          | 2.38    | 0.027   |
| Left Rectal Gyrus        | 2.55    | 0.019   |
